# Supplementary material for: Loss of Caspase‐Activated DNase Protects Against Atherosclerosis in Apolipoprotein E–Deficient Mice
Source: PubMed Central journal article supplement — J Am Heart Assoc. 2016 Dec 22;5(12):e004362. doi: 10.1161/JAHA.116.004362 (PMC5210397; doi:10.1161/jaha.116.004362), 2016-12-22
Supplement: JAH3-5-e004362-s001.pdf [file JAH3-5-e004362-s001.pdf]

# **Supplemental Material**

**Table S1. Antibodies for immunoblot analyses.**

| <b>Antibody</b>   | <b>Cat No.</b> | <b>Manufacturer</b> | <b>Sources of species</b> | <b>MW (kDa)</b> |
|-------------------|----------------|---------------------|---------------------------|-----------------|
| CAD               | SC8342         | Santa Cruz          | Rabbit                    | 40              |
| P-IKK $\beta$     | ab59195        | Abcam               | Rabbit                    | 87              |
| T-IKK $\beta$     | 8943           | CST                 | Rabbit                    | 87              |
| P-IkBa            | 9246           | CST                 | Mouse                     | 39              |
| T-IkBa            | 4814           | CST                 | Mouse                     | 39              |
| P-p65             | 3033           | CST                 | Rabbit                    | 65              |
| T-p65             | 4764           | CST                 | Rabbit                    | 65              |
| Bax               | 2772           | CST                 | Rabbit                    | 20              |
| Bcl2              | 2870           | CST                 | Rabbit                    | 26              |
| Caspase-3         | 9662           | CST                 | Rabbit                    | 35              |
| Cleaved-caspase-3 | 9661           | CST                 | Rabbit                    | 17,19           |
| P-MEK1/2          | 9154           | CST                 | Rabbit                    | 45              |
| T-MEK1/2          | 9122           | CST                 | Rabbit                    | 45              |
| P-ERK1/2          | 4370           | CST                 | Rabbit                    | 42,44           |
| T-ERK1/2          | 4695           | CST                 | Rabbit                    | 42,44           |
| P-JNK1/2          | 4668           | CST                 | Rabbit                    | 46,54           |
| T-JNK1/2          | 9252           | CST                 | Rabbit                    | 46,54           |
| P-p38             | 4511           | CST                 | Rabbit                    | 42              |
| T-p38             | 9212           | CST                 | Rabbit                    | 42              |
| GAPDH             | 2118           | CST                 | Rabbit                    | 37              |

**Table S2. Antibodies for Immunofluorescence and TUNEL staining.**

| <b>Antibody</b>  | <b>concentration</b> | <b>Sources of species</b> | <b>Cat No.</b> | <b>Manufacturer</b> |
|------------------|----------------------|---------------------------|----------------|---------------------|
| anti-CAD         | 1:100                | Rabbit                    | SC30061        | Santa Cruz          |
| anti-CD68        | 1:100                | Rat                       | MCA1957        | Bio-Rad             |
| anti-SMA         | 1:100                | mouse                     | ab7817         | Abcam               |
| anti-CD31        | 1:100                | Goat                      | AF3628         | R&D system          |
| anti-ICAM-1      | 1:100                | Goat                      | AF796          | R&D system          |
| anti-IL-6        | 1:100                | Goat                      | AF406NA        | R&D system          |
| anti-IL-10       | 1:100                | Goat                      | AF519          | R&D system          |
| anti-phospho P65 | 1:50                 | Rabbit                    | BS4135         | Bioworld            |
| anti-phospho ERK | 1:100                | Rabbit                    | 3192           | CST                 |

**Table S3. Body weight and the levels of serum lipids in CAD<sup>-/-</sup>ApoE<sup>-/-</sup> mice and ApoE<sup>-/-</sup> mice fed a high-fat diet for 28 weeks.**

|                             | ApoE <sup>-/-</sup> | CAD <sup>-/-</sup> ApoE <sup>-/-</sup> |
|-----------------------------|---------------------|----------------------------------------|
| Body weight (g)             | 40.61±0.49          | 40.14±0.87                             |
| TG (mg·dl <sup>-1</sup> )   | 84.13±0.53          | 82.93±0.59                             |
| TC (mg·dl <sup>-1</sup> )   | 521.65±5.08         | 519.04±6.14                            |
| VLDL (mg·dl <sup>-1</sup> ) | 550.94±4.89         | 544.40±3.99                            |
| IDL (mg·dl <sup>-1</sup> )  | 350.51±4.07         | 344.80±2.04                            |
| LDL (mg·dl <sup>-1</sup> )  | 214.11±3.29         | 207.50±1.67                            |
| HDL (mg·dl <sup>-1</sup> )  | 48.06±0.27          | 47.49±0.22                             |

No significance was found between the two groups. Body weight, n=20. Serum lipids, n=10.

TG, triglyceride; TC, total cholesterol; VLDL, very low-density lipoprotein; IDL, intermediate-density lipoprotein; LDL, low-density lipoprotein; HDL, high-density lipoprotein
